# Supplementary material
Source: publisher figshare collection journal article supplement (https://karger.figshare.com/ndownloader/files/27870078)
Supplement: Supplementary file 1 [file 27870078]

Supplemental material: List of references with individual OPCS patients’ information extracted (In Chinese).

[4]朗志清.周期性动眼神经痉挛迟缓现象一例[J].中华医学杂志,1980,60:24.

[5]罗正荣.Marcus-Gunn伴Axenfeld-Schürenberg氏综合征病例报告[J].中华眼科杂志,1980,16:267-269.

[6]黄远桂.周期性动眼神经麻痹1例报告[J].第四军医大学学报,1982,(04):338-339.

[7]张方华,吕名端.周期性动眼神经麻痹2例报告[J].中华医学杂志,1984,97(11):858-860

[8]徐昭旭.周期性动眼神经麻痹[J].医学科技,1986,(02):47-48.

[9]许继平.酰胺咪嗪治愈周期性动眼神经麻痹1例[J].中国神经精神疾病杂志,1988,(04):216.

[10]于钢,高美琴,王文田.Axenfeld-Schürenberg综合征二例[J].中华眼科杂志,1990,26:59-60.

[11]李少敏,李巧娴,甘晓玲.周期痉挛性动眼神经麻痹一例[J].中国斜视与小儿眼科杂志,1994,2(1):32-34.

[12]周联生,陈保健.周期性动眼神经麻痹二例报告[J].临床神经病学杂志,1998,11:221

[13]兰志辉,毛洪芳,董光美.周期性动眼神经麻痹一例[J].中国斜视与小儿眼科杂志,1999,(4):43.

[14]孟凡华.周期性动眼神经麻痹一例[J].中国斜视与小儿眼科杂志,2003,(01):32.

[15]杨素红,甘晓玲.周期性动眼神经麻痹[J].中国斜视与小儿眼科杂志,2003,(01):34-35.

[16]范西宁.周期性动眼神经麻痹1例[J].临床眼科杂志,2004,(03):229.

[17]鲍秀艳,翟彦君.周期性动眼神经麻痹一例[J].眼外伤职业眼病杂志.附眼科手术,2004,(05):359.

[18]谢琰臣,许贤豪,冯凯,孟晓梅,张华,刘银红,殷剑,乔立艳,国红.周期性动眼神经麻痹1例报告[J].中国神经精神疾病杂志,2005,(04):25.

[19]王玉维.周期性动眼神经瘫痪1例报告[J].脑与神经疾病杂志,2006,14:147.

[20]王媛,白大勇,吴倩,于刚.周期性动眼神经麻痹二例[J].眼科研究,2010,(11):1100.

[21]陈瑞玲,景筠,江汉秋,秦宁宁,卢炜.周期性动眼神经麻痹三例[J].中华眼科杂志,2011,47(1):69-71.

[22]许娜.周期性动眼神经麻痹误诊1例[J].中国中医眼科杂志,2019,(02):153-154.

[23]李亚珍,尤红,蒋尚融.周期性动眼神经麻痹1例[J].临床神经病学杂志,2019,32(4):281-294.

[24]田国红,王敏,冯超逸.变化多端—2例周期性动眼神经麻痹伴痉挛发作病例分析[J]. 中国眼耳鼻喉科杂志,2020,20(03):269-271.
